# Supplementary material for: Diagnostic yield of exome and genome sequencing after non-diagnostic multi-gene panels in patients with single-system diseases
Source: PubMed Central journal article supplement (PMC11127317; doi:10.1186/s13023-024-03213-x), 2024-05-24
Supplement: 13023_2024_3213_MOESM2_ESM.pdf [file 13023_2024_3213_MOESM2_ESM.pdf]

**Supplementary Table 2: Demographic information**

| Patient Number | Sex    | Current age (years) | Race                      | Division_1                  | Categories                                  | Age at onset of symptoms | Positive family history? | EGBP report                     | Finding in the EGBP report (Gene/ Inheritance/ c./p./transcript/zygosity)                                                                                                                                                                                                                                                                                                                                                                                                                                                                                                                                                                           | Difference between report and re-analysis (months) | Additional findings                           |
|----------------|--------|---------------------|---------------------------|-----------------------------|---------------------------------------------|--------------------------|--------------------------|---------------------------------|-----------------------------------------------------------------------------------------------------------------------------------------------------------------------------------------------------------------------------------------------------------------------------------------------------------------------------------------------------------------------------------------------------------------------------------------------------------------------------------------------------------------------------------------------------------------------------------------------------------------------------------------------------|----------------------------------------------------|-----------------------------------------------|
| 1              | Female | 19                  | White                     | Endocrinology               | Short Stature                               | Childhood                | Unknown                  | Negative Findings               |                                                                                                                                                                                                                                                                                                                                                                                                                                                                                                                                                                                                                                                     | 7                                                  |                                               |
| 2              | Male   | 8                   | White                     | Endocrinology               | Short Stature                               | Childhood                | Unknown                  | Uncertain Clinical Significance | <i>LHX4</i> /Autosomal Dominant/c.65 T>C/p.V22A/NM_033343.3/1:18019729/Heterozygous/Father Variant of uncertain significance                                                                                                                                                                                                                                                                                                                                                                                                                                                                                                                        | 8                                                  |                                               |
| 3              | Female | 16                  | White                     | Endocrinology               | Short Stature                               | Childhood                | Unknown                  | Negative Findings               |                                                                                                                                                                                                                                                                                                                                                                                                                                                                                                                                                                                                                                                     | 7                                                  |                                               |
| 4              | Male   | 5                   | White                     | Endocrinology               | Maturity Onset Diabetes of the Young (MODY) | Childhood                | No                       | Negative Findings               |                                                                                                                                                                                                                                                                                                                                                                                                                                                                                                                                                                                                                                                     | 7                                                  |                                               |
| 5              | Male   | 63                  | White                     | Neurology                   | Ataxia                                      | Adulthood (51-70)        | Unknown                  | Negative Findings               |                                                                                                                                                                                                                                                                                                                                                                                                                                                                                                                                                                                                                                                     | 12                                                 |                                               |
| 6              | Male   | 37                  | White                     | Endocrinology               | Early Onset Osteoporosis                    | No                       | Yes                      | Uncertain Clinical Significance | <i>CYP24A1</i> /Autosomal Recessive/c.73 C>G/p.P25A/NM_000782.4/20:52790046/Heterozygous/Unknown Variant of uncertain significance                                                                                                                                                                                                                                                                                                                                                                                                                                                                                                                  | 1                                                  |                                               |
| 7              | Female | 17                  | White                     | Endocrinology               | Short Stature                               | Childhood                | Yes                      | Uncertain Clinical Significance | <i>OBSL1</i> /Autosomal Recessive/c.3947A>G/p.(Q1316R)/NM_015311.2/Heterozygous/Unknown Variant of uncertain significance                                                                                                                                                                                                                                                                                                                                                                                                                                                                                                                           | 3                                                  |                                               |
| 8              | Female | 10                  | White                     | Endocrinology               | Short Stature                               | Neonatal                 | Yes                      | Negative Findings               |                                                                                                                                                                                                                                                                                                                                                                                                                                                                                                                                                                                                                                                     | 2                                                  |                                               |
| 9              | Male   | 14                  | White                     | Endocrinology               | Short Stature                               | Childhood                | No                       | Negative Findings               |                                                                                                                                                                                                                                                                                                                                                                                                                                                                                                                                                                                                                                                     | 15                                                 |                                               |
| 10             | Male   | 70                  | White                     | Endocrinology               | Maturity Onset Diabetes of the Young (MODY) | Adulthood (18-30)        | Yes                      | Negative Findings               |                                                                                                                                                                                                                                                                                                                                                                                                                                                                                                                                                                                                                                                     | 3                                                  |                                               |
| 11             | Male   | 36                  | White                     | Endocrinology               | Maturity Onset Diabetes of the Young (MODY) | Adulthood (31-50)        | Yes                      | Negative Findings               |                                                                                                                                                                                                                                                                                                                                                                                                                                                                                                                                                                                                                                                     | 10                                                 |                                               |
| 12             | Male   | 16                  | White                     | Endocrinology               | Maturity Onset Diabetes of the Young (MODY) | Childhood                | Yes                      | Negative Findings               |                                                                                                                                                                                                                                                                                                                                                                                                                                                                                                                                                                                                                                                     | 3                                                  |                                               |
| 13             | Male   | 33                  | White                     | Endocrinology               | Maturity Onset Diabetes of the Young (MODY) | Adulthood (18-30)        | Yes                      | Positive Findings               | <i>WFS1</i> /Autosomal Recessive/c.1558C>T/p.Gln520Ter/NM_006005.3/Heterozygous/Unknown/Pathogenic                                                                                                                                                                                                                                                                                                                                                                                                                                                                                                                                                  | 5                                                  |                                               |
| 14             | Male   | 11                  | White                     | Endocrinology               | Maturity Onset Diabetes of the Young (MODY) | Childhood                | Yes                      | Negative Findings               |                                                                                                                                                                                                                                                                                                                                                                                                                                                                                                                                                                                                                                                     | 27                                                 |                                               |
| 15             | Female | 76                  | Black or African American | Nephrology and Hypertension | Electrolyte imbalance                       | Unknown                  | Yes                      | Negative Findings               |                                                                                                                                                                                                                                                                                                                                                                                                                                                                                                                                                                                                                                                     | 19                                                 |                                               |
| 16             | Male   | 19                  | White                     | Infectious Diseases         | Auto-inflammatory Syndromes                 | Childhood                | No                       | Positive Findings               | <i>UNC13D</i> /Autosomal Recessive/c.2298+1G>A/IVS23+G>A/NM_199242.2/17:73830405/Heterozygous/Unknown/Likely pathogenic;CD27/Autosomal Recessive/c.778 C>T/p.P260S/NM_001242.4/12:6560553/Heterozygous/Unknown Variant of uncertain significance; <i>L1ST</i> /Autosomal Recessive/c.6238 G>C/p.A2080P/NM_000081.2/1:235926035/Heterozygous/Unknown Variant of uncertain significance; <i>MAGT1X</i> -linked/c.1002 G>A/p.M334I/NM_032121.5/X:77086388/Hemizygous/Unknown Variant of uncertain significance; <i>SLC7A7</i> /Autosomal Recessive/c.999 G>A/p.R333~/NM_001126106.2/14:23244749/Heterozygous/Unknown Variant of uncertain significance | 40                                                 |                                               |
| 17             | Female | 59                  | White                     | Nephrology and Hypertension | Glomerulopathy                              | Adulthood (18-30)        | Unknown                  | Uncertain Clinical Significance | <i>CASR</i> /Autosomal Dominant/Recessive/c.134 C>A/p.A45E/NM_000388.3/3:121973170/Heterozygous/Unknown Variant of uncertain significance                                                                                                                                                                                                                                                                                                                                                                                                                                                                                                           | 29                                                 |                                               |
| 18             | Female | 65                  | White                     | Nephrology and Hypertension | Glomerulopathy                              | Adulthood (31-50)        | Yes                      | Uncertain Clinical Significance | <i>LAMA5</i> /Autosomal Dominant/Recessive/c.4105 C>T/p.R1369W/NM_005560.3/20:60904847/Heterozygous/Unknown Variant of uncertain significance; <i>LAMA5</i> /Autosomal Dominant/Recessive/c.896 G>T/p.R299L/NM_005560.3/20:60926820/Heterozygous/Unknown Variant of uncertain significance; <i>NPHP4</i> /Autosomal Dominant/Recessive/c.271 T>C/p.P91L/NM_015102.3/1:6038338/Heterozygous/Unknown Variant of uncertain significance                                                                                                                                                                                                                | 41                                                 |                                               |
| 19             | Female | 65                  | White                     | Nephrology and Hypertension | Glomerulopathy                              | Adulthood (51-70)        | No                       | Negative Findings               |                                                                                                                                                                                                                                                                                                                                                                                                                                                                                                                                                                                                                                                     | 49                                                 |                                               |
| 20             | Male   | 40                  | White                     | Nephrology and Hypertension | Glomerulopathy                              | Unknown                  | Yes                      | Negative Findings               |                                                                                                                                                                                                                                                                                                                                                                                                                                                                                                                                                                                                                                                     | 33                                                 |                                               |
| 21             | Female | 63                  | White                     | Nephrology and Hypertension | Glomerulopathy                              | Adulthood (51-70)        | Yes                      | Negative Findings               |                                                                                                                                                                                                                                                                                                                                                                                                                                                                                                                                                                                                                                                     | 30                                                 | COL4A3 (NM_000091.4) c.3182 G>A; p.Gly1061Asp |
| 22             | Female | 59                  | White                     | Nephrology and Hypertension | Cysts                                       | Adulthood (31-50)        | Yes                      | Negative Findings               |                                                                                                                                                                                                                                                                                                                                                                                                                                                                                                                                                                                                                                                     | 33                                                 |                                               |

## Supplementary Table 2: Demographic information

|    |        |    |                  |                             |                    |                   |         |                                 |                                                                                                                                                                                                                                                                       |    |
|----|--------|----|------------------|-----------------------------|--------------------|-------------------|---------|---------------------------------|-----------------------------------------------------------------------------------------------------------------------------------------------------------------------------------------------------------------------------------------------------------------------|----|
| 23 | Male   | 51 | White            | Nephrology and Hypertension | Glomerulopathy     | Adulthood (31-50) | Yes     | Negative Findings               |                                                                                                                                                                                                                                                                       | 36 |
| 24 | Female | 46 | White            | Nephrology and Hypertension | Glomerulopathy     | Childhood         | Yes     | Uncertain Clinical Significance | <i>NPHP4</i> /Autosomal Dominant/Recessive/c.3028 G>A/p.D1010N/NM_015102.3/3:184910450/Heterozygous/Unknown/Variant of uncertain significance; <i>EHHADH</i> /Unknown/c.1736 G>C/p.W579S/NM_001966.3/1:5934950/Heterozygous/Unknown/Variant of uncertain significance | 41 |
| 25 | Male   | 71 | White            | Nephrology and Hypertension | Glomerulopathy     | Unknown           | Unknown | Uncertain Clinical Significance | <i>LAMA5</i> /Autosomal Dominant/Recessive/c.2248 G>A/p.V750M/NM_005560.3/20:60911471/Heterozygous/Unknown/Variant of uncertain significance                                                                                                                          | 34 |
| 26 | Male   | 48 | White            | Nephrology and Hypertension | Glomerulopathy     | Adulthood (31-50) | No      | Positive Findings               | <i>CYP24A1</i> /Autosomal Recessive/c.1396 C>T/p.R466X/NM_000782.4/20:52773965/Heterozygous/Unknown/Pathogenic; <i>UPK3A</i> /Autosomal Dominant/c.535 C>A/p.Q179K/NM_000695.3/22:45684988/Heterozygous/Unknown/Variant of uncertain significance                     | 28 |
| 27 | Female | 61 | White            | Nephrology and Hypertension | Stones             | Adulthood (51-70) | Unknown | Negative Findings               |                                                                                                                                                                                                                                                                       | 40 |
| 28 | Female | 45 | White            | Nephrology and Hypertension | CAKUT              | Adulthood (18-30) | Unknown | Negative Findings               |                                                                                                                                                                                                                                                                       | 37 |
| 29 | Male   | 50 | African American | Nephrology and Hypertension | Glomerulopathy     | Childhood         | No      | Uncertain Clinical Significance | <i>LAMA5</i> /Unknown/c.9211 G>A/p.D3071N/NM_005560.3/NA/Heterozygous/Unknown/Variant of uncertain significance                                                                                                                                                       | 40 |
| 30 | Female | 79 | White            | Nephrology and Hypertension | Stones             | Unknown           | Yes     | Negative Findings               |                                                                                                                                                                                                                                                                       | 57 |
| 31 | Male   | 44 | White            | Nephrology and Hypertension | Glomerulopathy     | Unknown           | Yes     | Positive Findings               | <i>NPHS2</i> /Autosomal Recessive/c.948delT/p.A317LfsX31/NM_014625.3/NA/Heterozygous/Unknown/Pathogenic                                                                                                                                                               | 40 |
| 32 | Male   | 22 | White            | Nephrology and Hypertension | CAKUT              | Childhood         | Yes     | Uncertain Clinical Significance | <i>LAMC1</i> /Unknown/c.3845dup/p.(E1283Gfs*3)/NM_002293.3/1:183102681/Heterozygous/Unknown/Variant of uncertain significance                                                                                                                                         | 37 |
| 33 | Female | 21 | White            | Nephrology and Hypertension | Glomerulopathy     | Childhood         | No      | Positive Findings               | <i>NPHS2</i> /Autosomal Recessive/c.138_142dupGGGCT/p.S48WfsX53/NM_014625.3/1:179544862/Heterozygous/Unknown/Pathogenic                                                                                                                                               | 48 |
| 34 | Female | 50 | Asian            | Nephrology and Hypertension | Glomerulopathy     | Adulthood (31-50) | Yes     | Uncertain Clinical Significance | <i>COL4A4</i> /Autosomal Dominant/Recessive/c.2124 A>T/p.R708S/NM_000092.4/2:227924892/Heterozygous/Unknown/Variant of uncertain significance                                                                                                                         | 4  |
| 35 | Female | 69 | White            | Nephrology and Hypertension | Glomerulopathy     | Adulthood (51-70) | Yes     | Negative Findings               |                                                                                                                                                                                                                                                                       | 37 |
| 36 | Male   | 78 | Asian Indian     | Nephrology and Hypertension | Glomerulopathy     | Adulthood (51-70) | No      | Uncertain Clinical Significance | <i>CFH</i> /Autosomal Dominant/Recessive/c.727 T>C/p.Y243H/NM_000186.3/1:196648860/Heterozygous/Unknown/Variant of uncertain significance                                                                                                                             | 34 |
| 37 | Male   | 65 | White            | Nephrology and Hypertension | Glomerulopathy     | Unknown           | Unknown | Negative Findings               |                                                                                                                                                                                                                                                                       | 31 |
| 38 | Female | 47 | White            | Nephrology and Hypertension | Stones             | Childhood         | Yes     | Positive Findings               | <i>NPH1P1</i> / Multi-Gene/Autosomal Recessive/2q13 Deletion/Heterozygous/Father/Pathogenic                                                                                                                                                                           | 23 |
| 39 | Female | 66 | White            | Nephrology and Hypertension | Glomerulopathy     | Unknown           | Unknown | Negative Findings               |                                                                                                                                                                                                                                                                       | 31 |
| 40 | Male   | 70 | White            | Nephrology and Hypertension | Tubulointerstitial | Unknown           | No      | Negative Findings               |                                                                                                                                                                                                                                                                       | 26 |
| 41 | Female | 43 | White            | Nephrology and Hypertension | CAKUT              | Unknown           | No      | Negative Findings               |                                                                                                                                                                                                                                                                       | 20 |
| 42 | Female | 71 | White            | Nephrology and Hypertension | Glomerulopathy     | Unknown           | Yes     | Negative Findings               |                                                                                                                                                                                                                                                                       | 17 |
| 43 | Female | 46 | White            | Nephrology and Hypertension | Stones             | Unknown           | Yes     | Negative Findings               |                                                                                                                                                                                                                                                                       | 6  |
| 44 | Female | 45 | White            | Nephrology and Hypertension | CAKUT              | Adulthood (31-50) | Yes     | Negative Findings               |                                                                                                                                                                                                                                                                       | 21 |
| 45 | Male   | 47 | White            | Nephrology and Hypertension | CAKUT              | Unknown           | No      | Uncertain Clinical Significance | <i>CFHR5</i> /Autosomal Dominant/1415 C>G/S472X/NM_030787.3/1:196973875/Heterozygous/Unknown/Variant of uncertain significance                                                                                                                                        | 12 |
| 46 | Female | 67 | White            | Nephrology and Hypertension | Cysts              | Unknown           | Unknown | Negative Findings               |                                                                                                                                                                                                                                                                       | 42 |
|    |        |    |                  |                             |                    |                   |         |                                 | <i>HNFA1A</i> (NM_000545.8) c.1745A>G, p.(His582Arg)                                                                                                                                                                                                                  |    |
|    |        |    |                  |                             |                    |                   |         |                                 | <i>NPHS2</i> (NM_014625.4) c.686G>A; p.Arg229Gln                                                                                                                                                                                                                      |    |
|    |        |    |                  |                             |                    |                   |         |                                 | <i>RRAGD</i> (NM_021244.4) c.272C>T p. Thr91Ile                                                                                                                                                                                                                       |    |

## Supplementary Table 2: Demographic information

|    |        |    |                        |                             |                               |                   |         |                                 |                                                                                                                                                                                                                                                                                                                                                                                                                                    |    |
|----|--------|----|------------------------|-----------------------------|-------------------------------|-------------------|---------|---------------------------------|------------------------------------------------------------------------------------------------------------------------------------------------------------------------------------------------------------------------------------------------------------------------------------------------------------------------------------------------------------------------------------------------------------------------------------|----|
| 47 | Female | 63 | White                  | Nephrology and Hypertension | CAKUT                         | Unknown           | Unknown | Uncertain Clinical Significance | <i>SLC12A3</i> /Autosomal Recessive/c.1196_1202dupGTGATG/p.S402X/NM_000339.2/16:56913006/Heterozygous/Unknown/Pathogenic; <i>SLC12A3</i> /Autosomal Recessive/c.434 G>A/p.R145H/NM_000339.2/16:56902213/Heterozygous/Unknown/Variant of uncertain significance                                                                                                                                                                     | 5  |
| 48 | Female | 41 | White                  | Nephrology and Hypertension | Glomerulopathy                | Adulthood (31-50) | Yes     | Negative Findings               |                                                                                                                                                                                                                                                                                                                                                                                                                                    | 56 |
| 49 | Male   | 58 | White                  | Nephrology and Hypertension | Tubulointerstitial            | Adulthood (51-70) | Yes     | Uncertain Clinical Significance | <i>NEK8</i> /Unknown/c.67 C>T/p.R23X/NM_178170.2/NA/Heterozygous/Unknown/Likely pathogenic                                                                                                                                                                                                                                                                                                                                         | 54 |
| 50 | Male   | 77 | African American       | Nephrology and Hypertension | Cysts                         | Adulthood (51-70) | Yes     | Uncertain Clinical Significance | <i>NOTCH2</i> /Unknown/c.6139 C>T/p.R2047W/NM_024408.3/NA/Heterozygous/Unknown/Variant of uncertain significance; <i>PKD2</i> /Unknown/c.2866 G>A/p.E956K/NM_000297.3/NA/Heterozygous/Unknown/Variant of uncertain significance                                                                                                                                                                                                    | 49 |
| 51 | Male   | 67 | White                  | Nephrology and Hypertension | Cysts                         | Adulthood (51-70) | Yes     | Negative Findings               |                                                                                                                                                                                                                                                                                                                                                                                                                                    | 48 |
| 52 | Female | 52 | White                  | Nephrology and Hypertension | Stones                        | Adulthood (18-30) | Yes     | Negative Findings               |                                                                                                                                                                                                                                                                                                                                                                                                                                    | 3  |
| 53 | Female | 31 | White                  | Nephrology and Hypertension | Glomerular (FSGS)             | Childhood         | No      | Negative Findings               |                                                                                                                                                                                                                                                                                                                                                                                                                                    | 10 |
| 54 | Male   | 70 | White                  | Nephrology and Hypertension | Glomerulopathy                | Adulthood (18-30) | No      | Uncertain Clinical Significance | <i>PKD1</i> /Autosomal Dominant/c.7699A>T/p.Asn2567Tyr/NM_001009944.3/Heterozygous/Unknown/Variant of uncertain significance                                                                                                                                                                                                                                                                                                       | 27 |
| 55 | Male   | 36 | White                  | Nephrology and Hypertension | Glomerulopathy                | Childhood         | Yes     | Positive Findings               | <i>TTC21B</i> /Autosomal Recessive/c.626C>T/p.Pro209Leu/NM_024753.5/Homozygous/Unknown/Pathogenic                                                                                                                                                                                                                                                                                                                                  | 9  |
| 56 | Male   | 14 | Other                  | Nephrology and Hypertension | Glomerulopathy                | Childhood         | No      | Uncertain Clinical Significance | <i>CUBN</i> /Autosomal Recessive/c.2144C>T/p.(P715L)/10:17126427/Heterozygous/Unknown/Variant of uncertain significance; <i>NPHS1</i> /Autosomal Recessive/c.2210 A>C/p.(H737P)/19:36335007/Heterozygous/Unknown/Variant of uncertain significance                                                                                                                                                                                 | 11 |
| 57 | Male   | 59 | White                  | Nephrology and Hypertension | Glomerulopathy                | Adulthood (51-70) | Yes     | Negative Findings               |                                                                                                                                                                                                                                                                                                                                                                                                                                    | 12 |
| 58 | Female | 52 | Other                  | Nephrology and Hypertension | Glomerulopathy                | Adulthood (31-50) | No      | Negative Findings               |                                                                                                                                                                                                                                                                                                                                                                                                                                    | 7  |
| 59 | Female | 54 | White                  | Nephrology and Hypertension | Glomerulopathy                | Adulthood (51-70) | No      | Negative Findings               |                                                                                                                                                                                                                                                                                                                                                                                                                                    | 11 |
| 60 | Male   | 73 | Choose Not to Disclose | Pulmonary Medicine          | Idiopathic Pulmonary Fibrosis | Adulthood (51-70) | Yes     | Negative Findings               |                                                                                                                                                                                                                                                                                                                                                                                                                                    | 12 |
| 61 | Female | 71 | White                  | Pulmonary Medicine          | Idiopathic Pulmonary Fibrosis | Adulthood (51-70) | No      | Negative Findings               |                                                                                                                                                                                                                                                                                                                                                                                                                                    | 22 |
| 62 | Male   | 54 | White                  | Pulmonary Medicine          | Idiopathic Pulmonary Fibrosis | Adulthood (31-50) | No      | Negative Findings               |                                                                                                                                                                                                                                                                                                                                                                                                                                    | 21 |
| 63 | Male   | 63 | White                  | Pulmonary Medicine          | Idiopathic Pulmonary Fibrosis | Adulthood (31-50) | Yes     | Uncertain Clinical Significance | <i>TERT</i> /Autosomal Dominant/Recessive/c.1979_1981dupCAC/p.A660_L661insP/NM_198253.2/5:1279557/Heterozygous/Unknown/Variant of uncertain significance                                                                                                                                                                                                                                                                           | 13 |
| 64 | Male   | 60 | White                  | Pulmonary Medicine          | Idiopathic Pulmonary Fibrosis | Adulthood (51-70) | No      | Negative Findings               |                                                                                                                                                                                                                                                                                                                                                                                                                                    | 11 |
| 65 | Male   | 77 | White                  | Pulmonary Medicine          | Idiopathic Pulmonary Fibrosis | Adulthood (>70)   | Yes     | Negative Findings               |                                                                                                                                                                                                                                                                                                                                                                                                                                    | 6  |
| 66 | Male   | 71 | White                  | Pulmonary Medicine          | Idiopathic Pulmonary Fibrosis | Adulthood (51-70) | Yes     | Negative Findings               |                                                                                                                                                                                                                                                                                                                                                                                                                                    | 21 |
| 67 | Male   | 56 | White                  | Pulmonary Medicine          | Idiopathic Pulmonary Fibrosis | Adulthood (51-70) | Yes     | Uncertain Clinical Significance | <i>ABCA3</i> /Autosomal Recessive/c.2125 C>T/p.(R709W)/NM_001089.2/16:2347468/Heterozygous/Unknown/Variant of uncertain significance; <i>RTEL1</i> /Autosomal Dominant/Recessive/c.2723 C>T/p.(P908L)/NM_032957.4/20:62323189/Heterozygous/Mother Variant of uncertain significance; <i>RTEL1</i> /Autosomal Dominant/Recessive/c.2321 G>T/p.(R774L)/NM_032957.4/20:62321547/Heterozygous/Mother Variant of uncertain significance | 4  |
| 68 | Male   | 58 | White                  | Pulmonary Medicine          | Idiopathic Pulmonary Fibrosis | Adulthood (51-70) | Yes     | Negative Findings               |                                                                                                                                                                                                                                                                                                                                                                                                                                    | 4  |
| 69 | Male   | 74 | White                  | Pulmonary Medicine          | Idiopathic Pulmonary Fibrosis | Adulthood (>70)   | Yes     | Uncertain Clinical Significance | <i>HPS4</i> /Autosomal Recessive/c.1397 G>A/p.(R466H)/NM_022081.5/22:26860199/Heterozygous/Unknown/Variant of uncertain significance                                                                                                                                                                                                                                                                                               | 3  |
| 70 | Female | 82 | White                  | Pulmonary Medicine          | Idiopathic Pulmonary Fibrosis | Adulthood (>70)   | Yes     | Uncertain Clinical Significance | <i>GBA</i> /Autosomal Recessive/c.1279 G>A/p.(E427K)/NM_001005741.2/1:15520581/Heterozygous/Unknown/Variant of uncertain significance; <i>SLC4A2</i> /Autosomal Recessive/c.1207 A>G/p.(H403V)/NM_006424.2/4:25674867/Heterozygous/Unknown/Variant of uncertain significance                                                                                                                                                       | 4  |
| 71 | Female | 79 | White                  | Pulmonary Medicine          | Idiopathic Pulmonary Fibrosis | Adulthood (51-70) | No      | Negative Findings               |                                                                                                                                                                                                                                                                                                                                                                                                                                    | 41 |

## Supplementary Table 2: Demographic information

|    |        |    |       |              |                             |                   |         |                                 |                                                                                                                                                                                                                                                                                                                                                                                                                                                                                                                                                                                                                                                                                                                                                                                                        |    |
|----|--------|----|-------|--------------|-----------------------------|-------------------|---------|---------------------------------|--------------------------------------------------------------------------------------------------------------------------------------------------------------------------------------------------------------------------------------------------------------------------------------------------------------------------------------------------------------------------------------------------------------------------------------------------------------------------------------------------------------------------------------------------------------------------------------------------------------------------------------------------------------------------------------------------------------------------------------------------------------------------------------------------------|----|
| 72 | Male   | 14 | White | Rheumatology | Auto-inflammatory Syndromes | Childhood         | No      | Negative Findings               |                                                                                                                                                                                                                                                                                                                                                                                                                                                                                                                                                                                                                                                                                                                                                                                                        | 21 |
|    |        |    |       |              |                             |                   |         |                                 | <i>NOD2</i> /Autosomal Dominant/c.566 C>T;p.T189M/NM_022162.1/16; 50741791/Heterozygous/Mother/Variant of uncertain significance; <i>TMEM173</i> /Autosomal Dominant/c.1109 A>G;p.K370R/NM_198282.3/5: 138855877/Heterozygous/Mother/Variant of uncertain significance                                                                                                                                                                                                                                                                                                                                                                                                                                                                                                                                 |    |
| 73 | Female | 20 | White | Rheumatology | Auto-inflammatory Syndromes | Childhood         | No      | Uncertain Clinical Significance |                                                                                                                                                                                                                                                                                                                                                                                                                                                                                                                                                                                                                                                                                                                                                                                                        | 21 |
| 74 | Female | 6  | White | Rheumatology | Auto-inflammatory Syndromes | Childhood         | No      | Uncertain Clinical Significance | <i>ITK</i> /Autosomal Recessive/c.1551 C>T;p.G517<del>=NM_005546.3/5; 156672927/Heterozygous/Mother/Variant of uncertain significance                                                                                                                                                                                                                                                                                                                                                                                                                                                                                                                                                                                                                                                                  | 20 |
| 75 | Female | 6  | White | Rheumatology | Auto-inflammatory Syndromes | Childhood         | Yes     | Uncertain Clinical Significance | <i>PSTPIP1</i> /Autosomal Dominant/c.566 G>A;p.R189Q/NM_003978.3/15; 77322846/Heterozygous/Father/Variant of uncertain significance                                                                                                                                                                                                                                                                                                                                                                                                                                                                                                                                                                                                                                                                    | 16 |
| 76 | Female | 21 | White | Rheumatology | Auto-inflammatory Syndromes | Childhood         | Yes     | Uncertain Clinical Significance | <i>BTK</i> X-linked/c.500 T>A;p.I167N/NM_000061.2X: 100617569/Heterozygous/Unknown/Variant of uncertain significance                                                                                                                                                                                                                                                                                                                                                                                                                                                                                                                                                                                                                                                                                   | 33 |
| 77 | Female | 19 | White | Rheumatology | Auto-inflammatory Syndromes | Childhood         | Yes     | Uncertain Clinical Significance | <i>PRF1</i> /Autosomal Recessive/c.272 C>T;p.A91V/NM_001083116.1/NA/Heterozygous/Unknown/Risk allele                                                                                                                                                                                                                                                                                                                                                                                                                                                                                                                                                                                                                                                                                                   | 15 |
| 78 | Male   | 11 | White | Rheumatology | Auto-inflammatory Syndromes | Childhood         | Yes     | Uncertain Clinical Significance | <i>NLRP1</i> /Autosomal Dominant/Recessive/c.3973 G>A;p.V1325I/NM_033004.3/17; 5421150/Heterozygous/Mother/Variant of uncertain significance                                                                                                                                                                                                                                                                                                                                                                                                                                                                                                                                                                                                                                                           | 16 |
|    |        |    |       |              |                             |                   |         |                                 | <i>G6PC3</i> /Autosomal Recessive/c.596 A>T;p.Y199F/NM_138387.3/17; 42152738/Heterozygous/Mother/Variant of uncertain significance; <i>MEFV</i> /Autosomal Recessive/c.442 G>C;p.E148Q/NM_000243.2/16: 3304626/Heterozygous/Mother/Variant of uncertain significance; <i>NOD2</i> /Autosomal Dominant/c.140 C>T;p.S47L/NM_022162.1/16: 50733465/Heterozygous/Mother/Variant of uncertain significance; <i>PLCG2</i> /Autosomal Dominant/c.2312 A>G;p.Q771R/NM_002661.4/16: 81957094/Heterozygous/Father/Variant of uncertain significance; <i>PSTPIP1</i> /Autosomal Dominant/c.839 C>T;p.A280V/NM_003978.3/15; 77325203/Heterozygous/Father/Variant of uncertain significance; <i>JMASE1</i> /Unknown/c.319 A>G;p.R107G/NM_005223.3/16: 3706185/Heterozygous/Father/Variant of uncertain significance | 13 |
| 79 | Female | 24 | White | Rheumatology | Auto-inflammatory Syndromes | Adulthood (18-50) | No      | Uncertain Clinical Significance |                                                                                                                                                                                                                                                                                                                                                                                                                                                                                                                                                                                                                                                                                                                                                                                                        |    |
|    |        |    |       |              |                             |                   |         |                                 | <i>DCLRE1C</i> /Autosomal Recessive/c.799 T>C;p.W367R/NM_001033855.1/10; 14970133/Heterozygous/Father/Variant of uncertain significance; <i>ELANE</i> /Autosomal Dominant/c.740 A>T;p.Q247L/NM_001972.2/19: 856100/Heterozygous/Father/Variant of uncertain significance; <i>NLRP3</i> /Autosomal Dominant/c.598 G>A;p.V200M/NM_004895.4/1: 247587343/Heterozygous/Father/Variant of uncertain significance; <i>PSMB9</i> /Unknown/c.517 C>T;p.R173C/NM_002800.4/6: 32826267/Heterozygous/Mother/Variant of uncertain significance                                                                                                                                                                                                                                                                     | 12 |
| 80 | Female | 15 | White | Rheumatology | Auto-inflammatory Syndromes | Childhood         | No      | Uncertain Clinical Significance |                                                                                                                                                                                                                                                                                                                                                                                                                                                                                                                                                                                                                                                                                                                                                                                                        |    |
|    |        |    |       |              |                             |                   |         |                                 | <i>CARD14</i> /Autosomal Dominant/c.1082_1089+27del35/Heterozygous/Mother/Variant of uncertain significance; <i>RAG2</i> /Autosomal Recessive/c.1222 G>A;p.E408K/Heterozygous/Mother/Variant of uncertain significance; <i>TNFAIP3</i> /Autosomal Dominant/c.2231 G>A;p.G744D/Heterozygous/Mother/Variant of uncertain significance                                                                                                                                                                                                                                                                                                                                                                                                                                                                    | 27 |
| 81 | Male   | 5  | White | Rheumatology | Auto-inflammatory Syndromes | Childhood         | No      | Uncertain Clinical Significance |                                                                                                                                                                                                                                                                                                                                                                                                                                                                                                                                                                                                                                                                                                                                                                                                        |    |
| 82 | Female | 5  | White | Rheumatology | Auto-inflammatory Syndromes | Childhood         | No      | Uncertain Clinical Significance | <i>LIG4</i> /Autosomal Recessive/c.108C>G;p.I36M/NM_002312.3/13: 108863509/Heterozygous/Mother/Variant of uncertain significance                                                                                                                                                                                                                                                                                                                                                                                                                                                                                                                                                                                                                                                                       | 6  |
| 83 | Male   | 20 | White | Rheumatology | Auto-inflammatory Syndromes | Childhood         | No      | Uncertain Clinical Significance | <i>STAT1</i> /Autosomal Dominant/Recessive/c.1098-11T>A;p.?/NM_007315.3/2: 191851805/Heterozygous/Father/Variant of uncertain significance                                                                                                                                                                                                                                                                                                                                                                                                                                                                                                                                                                                                                                                             | 10 |
| 84 | Female | 51 | White | Rheumatology | Auto-inflammatory Syndromes | Adulthood (31-50) | Yes     | Uncertain Clinical Significance | <i>TRNT1</i> /Autosomal Recessive/c.809 C>G;p.P270R/MN_182916.2/3: 3189140/Heterozygous/Unknown/Variant of uncertain significance                                                                                                                                                                                                                                                                                                                                                                                                                                                                                                                                                                                                                                                                      | 7  |
| 85 | Male   | 15 | White | Rheumatology | Auto-inflammatory Syndromes | Childhood         | Yes     | Uncertain Clinical Significance | <i>ADA</i> /Autosomal Recessive/c.591T>A;p.H197Q/NM_000022.2/20: 43252858/Heterozygous/Father/Variant of uncertain significance                                                                                                                                                                                                                                                                                                                                                                                                                                                                                                                                                                                                                                                                        | 7  |
| 86 | Female | 19 | White | Rheumatology | Auto-inflammatory Syndromes | Childhood         | Yes     | Uncertain Clinical Significance | <i>AP3B1</i> /Autosomal Recessive/c.1198 G>C;p.(A400P)/NM_003664.3/5: 77461466/Heterozygous/Father/Variant of uncertain significance; <i>DOCK8</i> /Autosomal Recessive/c.4774 T>C;p.(F1592L)/NM_203447.3/9: 432313/Heterozygous/Father/Variant of uncertain significance                                                                                                                                                                                                                                                                                                                                                                                                                                                                                                                              | 7  |
| 87 | Female | 34 | White | Rheumatology | Auto-inflammatory Syndromes | Adulthood (31-50) | No      | Uncertain Clinical Significance | <i>TNFAIP3</i> /Autosomal Dominant/c.2231 G>A;p.(G744D)/NM_006290.3/6: 138202314/Heterozygous/Unknown/Variant of uncertain significance                                                                                                                                                                                                                                                                                                                                                                                                                                                                                                                                                                                                                                                                | 5  |
| 88 | Female | 12 | White | Rheumatology | Auto-inflammatory Syndromes | Childhood         | Yes     | Negative Findings               |                                                                                                                                                                                                                                                                                                                                                                                                                                                                                                                                                                                                                                                                                                                                                                                                        | 3  |
|    |        |    |       |              |                             |                   |         |                                 | <i>ELANE</i> /Autosomal Dominant/c.740 A>T;p.(Q247L)/NM_001972.2/19: 856100/Heterozygous/Unknown/Variant of uncertain significance; <i>PIK3CD</i> /Autosomal Dominant/c.854 T>C;p.(M285T)/NM_005026.3/1: 9777090/Heterozygous/Unknown/Variant of uncertain significance; <i>PIK3R1</i> /Autosomal Dominant/Recessive/c.586 C>T;p.(P196S)/NM_181523.2/5: 67575513/Heterozygous/Unknown/Variant of uncertain significance; <i>RAG2</i> /Autosomal Recessive/c.368 G>A;p.(R123H)/NM_000536.3/11: 36615351/Heterozygous/Unknown/Variant of uncertain significance; <i>RVASEH2B</i> /Autosomal Recessive/c.787 A>G;p.(T263A)/NM_024570.3/13: 51528086/Heterozygous/Unknown/Variant of uncertain significance                                                                                                | 3  |
| 89 | Female | 39 | White | Rheumatology | Auto-inflammatory Syndromes | Adulthood (31-50) | Yes     | Uncertain Clinical Significance |                                                                                                                                                                                                                                                                                                                                                                                                                                                                                                                                                                                                                                                                                                                                                                                                        | 3  |
| 90 | Female | 40 | White | Rheumatology | Auto-inflammatory Syndromes | Adulthood (18-30) | Yes     | Uncertain Clinical Significance | <i>PRF1</i> /Autosomal Recessive/c.272 C>T;p.(A91V)/NM_001083116.1/NA/Heterozygous/Unknown/Risk allele                                                                                                                                                                                                                                                                                                                                                                                                                                                                                                                                                                                                                                                                                                 | 7  |
| 91 | Female | 26 | White | Rheumatology | Auto-inflammatory Syndromes | Childhood         | Unknown | Uncertain Clinical Significance |                                                                                                                                                                                                                                                                                                                                                                                                                                                                                                                                                                                                                                                                                                                                                                                                        | 2  |
|    |        |    |       |              |                             |                   |         |                                 | <i>PRF1</i> /Autosomal Recessive/c.272 C>T;p.(A91V)/NM_001083116.1/10: 72360387/Heterozygous/Unknown/Risk allele; <i>PSMB9</i> /Unknown/c.517                                                                                                                                                                                                                                                                                                                                                                                                                                                                                                                                                                                                                                                          |    |

## Supplementary Table 2: Demographic information

|     |        |    |       |              |                             |                   |         |                                 |                                                                                                                                                                                                                                                  |    |
|-----|--------|----|-------|--------------|-----------------------------|-------------------|---------|---------------------------------|--------------------------------------------------------------------------------------------------------------------------------------------------------------------------------------------------------------------------------------------------|----|
|     |        |    |       |              |                             |                   |         |                                 | C>Tp.(R173C)/NM_002800.4/6:32826267/Heterozygous/Unknown/Variant of uncertain significance                                                                                                                                                       |    |
| 92  | Female | 32 | White | Rheumatology | Auto-inflammatory Syndromes | Adulthood (18-30) | No      | Negative Findings               |                                                                                                                                                                                                                                                  | 1  |
| 93  | Female | 67 | White | Rheumatology | Auto-inflammatory Syndromes | Childhood         | Yes     | Uncertain Clinical Significance | SLC37A4/Autosomal Recessive/c.857 G>A/p.(R286Q)/NM_001164277.1/11:118897326/Heterozygous/Unknown/Variant of uncertain significance;WASX-linked/c.1112 C>Tp.(P371L)/NM_000377.2/X:48547229/Heterozygous/Unknown/Variant of uncertain significance | 9  |
| 94  | Male   | 32 | White | Rheumatology | Auto-inflammatory Syndromes | Adulthood (31-50) | Yes     | Uncertain Clinical Significance | NLRP12/Autosomal Dominant/c.586A>G/p.Ile196Val/NM_144687.4/Heterozygous/Unknown/Variant of uncertain significance                                                                                                                                | 9  |
| 95  | Female | 38 | White | Rheumatology | Auto-inflammatory Syndromes | Adulthood (31-50) | Yes     | Negative Findings               |                                                                                                                                                                                                                                                  | 10 |
| 96  | Male   | 19 | White | Rheumatology | Auto-inflammatory Syndromes | Childhood         | No      | Negative Findings               |                                                                                                                                                                                                                                                  | 6  |
| 97  | Female | 43 | White | Rheumatology | Auto-inflammatory Syndromes | Adulthood (31-50) | Yes     | Positive Findings               | NOD2/Autosomal Dominant/c.2023C>T/p.Arg675Trp/NM_001370466.1/Heterozygous/Unknown;NOD2/Autosomal Dominant/c.2717+158C>T/NM_001370466.1/Heterozygous/Unknown                                                                                      | 8  |
| 98  | Female | 40 | White | Rheumatology | Auto-inflammatory Syndromes | Childhood         | Yes     | Negative Findings               |                                                                                                                                                                                                                                                  | 7  |
| 99  | Male   | 21 | White | Rheumatology | Auto-inflammatory Syndromes | Childhood         | Yes     | Negative Findings               |                                                                                                                                                                                                                                                  | 6  |
| 100 | Female | 42 | White | Rheumatology | Auto-inflammatory Syndromes | Adulthood (31-50) | Unknown | Negative Findings               |                                                                                                                                                                                                                                                  | 2  |
